# Supplementary material for: Age and gender specific estimation of visceral adipose tissue amounts from radiological images in morbidly obese patients
Source: PubMed Central journal article supplement (PMC4806365; doi:10.1038/srep22261), 2016-03-24
Supplement: srep22261-s1.pdf [file srep22261-s1.pdf]

## Supplementary information

### Age and gender specific estimation of visceral adipose tissue amounts from radiological images in morbidly obese patients

Nicolas Linder, MD <sup>1,2,†</sup>, Alexander Schaudinn, MD <sup>1,2,†</sup>, Nikita Garnov, PhD <sup>1,2</sup>,  
Matthias Blüher, MD <sup>2,3</sup>, Arne Dietrich, MD <sup>2,4</sup>, Tatjana Schütz, PhD <sup>2,4</sup>, Stefanie Lehmann,  
MPH <sup>2</sup>, Ulf Retschlag <sup>2</sup>, Thomas Karlas, MD <sup>2,5</sup>, Thomas Kahn, MD <sup>1</sup>, Harald Busse, PhD<sup>1\*</sup>

<sup>1</sup> Department of Diagnostic and Interventional Radiology, Leipzig University Hospital,  
Liebigstrasse 20, Leipzig, Germany

<sup>2</sup> Integrated Research and Treatment Center (IFB) Adiposity Diseases, Leipzig University  
Medical Center, Leipzig, Germany

<sup>3</sup> Department of Internal Medicine, Neurology and Dermatology, Division of Endocrinology and  
Nephrology, Leipzig University Hospital, Leipzig, Germany

<sup>4</sup> Department of Visceral, Transplantation, Thoracic and Vascular Surgery, Division of Bariatric  
Surgery, Leipzig University Hospital, Leipzig, Germany

<sup>5</sup> Department of Internal Medicine, Neurology and Dermatology, Division of Gastroenterology  
and Rheumatology, Leipzig University Hospital, Leipzig, Germany

<sup>†</sup> Both authors have equally contributed to this work.

\* **Correspondence to:** Harald Busse  
Department of Diagnostic and Interventional Radiology  
Leipzig University Hospital  
Liebigstrasse 20  
04103 Leipzig, Germany  
Phone / Fax: +49 (341) 97-17413 / -17409  
Email: harald.busse@medizin.uni-leipzig.de

|                          | <b>Females</b>              | <b>Males</b>                 |
|--------------------------|-----------------------------|------------------------------|
| Number of Patients       | <i>n</i> =94                | <i>n</i> =36                 |
| Age [years]              | 44.4 ± 11.4 (18.6 – 70.7)   | 44.3 ± 10.8 (22.2 – 63.6)    |
| Height [cm]              | 166.2 ± 7.1 (151 – 186)     | 179.9 ± 7.8 (162 – 203)      |
| Weight [kg]              | 128.2 ± 17.4 (94.0 – 168.0) | 151.0 ± 17.6 (120.6 – 185.5) |
| BMI [kg/m <sup>2</sup> ] | 46.4 ± 5.4 (40.3 – 64.1)    | 46.6 ± 4.3 (40.1 – 57.0)     |

**Table S1: Anthropometric data** of our study population (*n*=130) for both genders reported as mean ± standard deviation (range).

|                     | Females     |              | Males       |              |
|---------------------|-------------|--------------|-------------|--------------|
|                     | $R^2$       | $f$          | $R^2$       | $f$          |
| $A_{VAT-1}$ (L1-L2) | 0.77        | 0.036        | <b>0.90</b> | <b>0.039</b> |
| $A_{VAT-1}$ (L2-L3) | 0.84        | 0.042        | 0.88        | 0.041        |
| $A_{VAT-1}$ (L3-L4) | <b>0.87</b> | <b>0.045</b> | 0.70        | 0.040        |
| $A_{VAT-1}$ (L4-L5) | 0.72        | 0.041        | 0.68        | 0.032        |
| $A_{VAT-1}$ (L5-S1) | 0.67        | 0.030        | 0.77        | 0.023        |
| $A_{VAT-1}$ (UM)    | 0.44        | 0.037        | 0.55        | 0.030        |
| $A_{VAT-1}$ (FH)    | 0.85        | 0.012        | 0.48        | 0.008        |
| $A_{VAT-5}$ (L1-L2) | 0.80        | 0.179        | <b>0.93</b> | <b>0.194</b> |
| $A_{VAT-5}$ (L2-L3) | 0.88        | 0.210        | 0.86        | 0.202        |
| $A_{VAT-5}$ (L3-L4) | <b>0.89</b> | <b>0.222</b> | 0.76        | 0.198        |
| $A_{VAT-5}$ (L4-L5) | 0.78        | 0.203        | 0.71        | 0.162        |
| $A_{VAT-5}$ (L5-S1) | 0.70        | 0.156        | 0.77        | 0.122        |
| $A_{VAT-5}$ (UM)    | 0.50        | 0.186        | 0.53        | 0.151        |
| $A_{VAT-5}$ (FH)    | 0.48        | 0.092        | 0.52        | 0.065        |

**Table S2: Coefficients of determination  $R^2$**  of linear regression between segmented VAT areas of single ( $A_{VAT-1}$ ) or five adjacent slices ( $A_{VAT-5}$ ) and total VAT volumes ( $V_{VAT-T}$ ) for different anatomical landmarks (see text for abbreviations) with resulting scaling factors  $f$ . Corresponding conversion or scaling factors  $f$  are given for both genders. Bold values indicate best correlation.

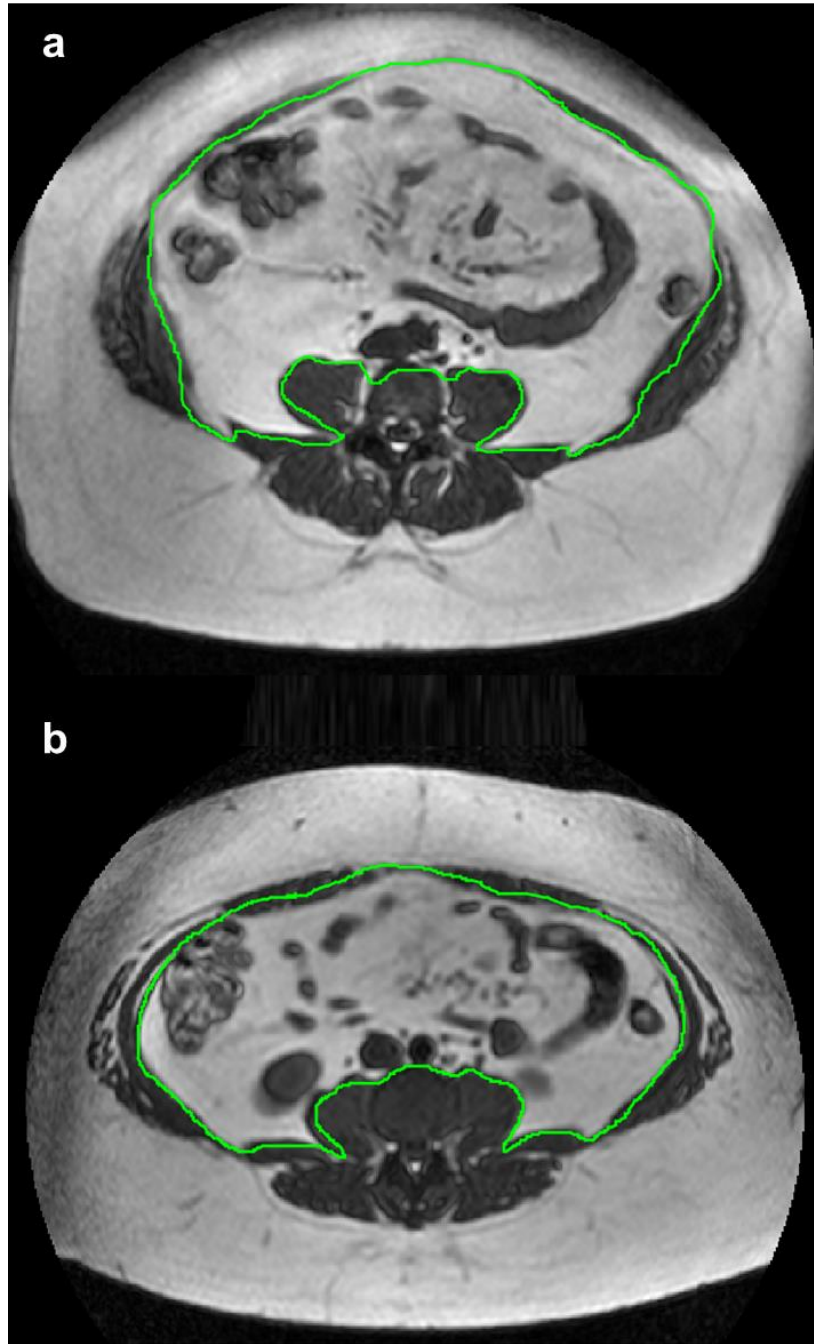

**Figure S3: Comparison of MRI-derived VAT amounts at lumbar disc level L3-L4 for two morbidly obese patients "a" and "b" (same gender).** Contours denote segmented VAT boundaries. Patient "a" had a 65% larger VAT area  $A_{VAT-1}$  and a 55% larger total VAT volume  $V_{VAT-T}$  (between diaphragm and pelvic floor) although both patients happened to have the same BMI. Note that SAT is cut off at the edges of the FOV (53 cm).

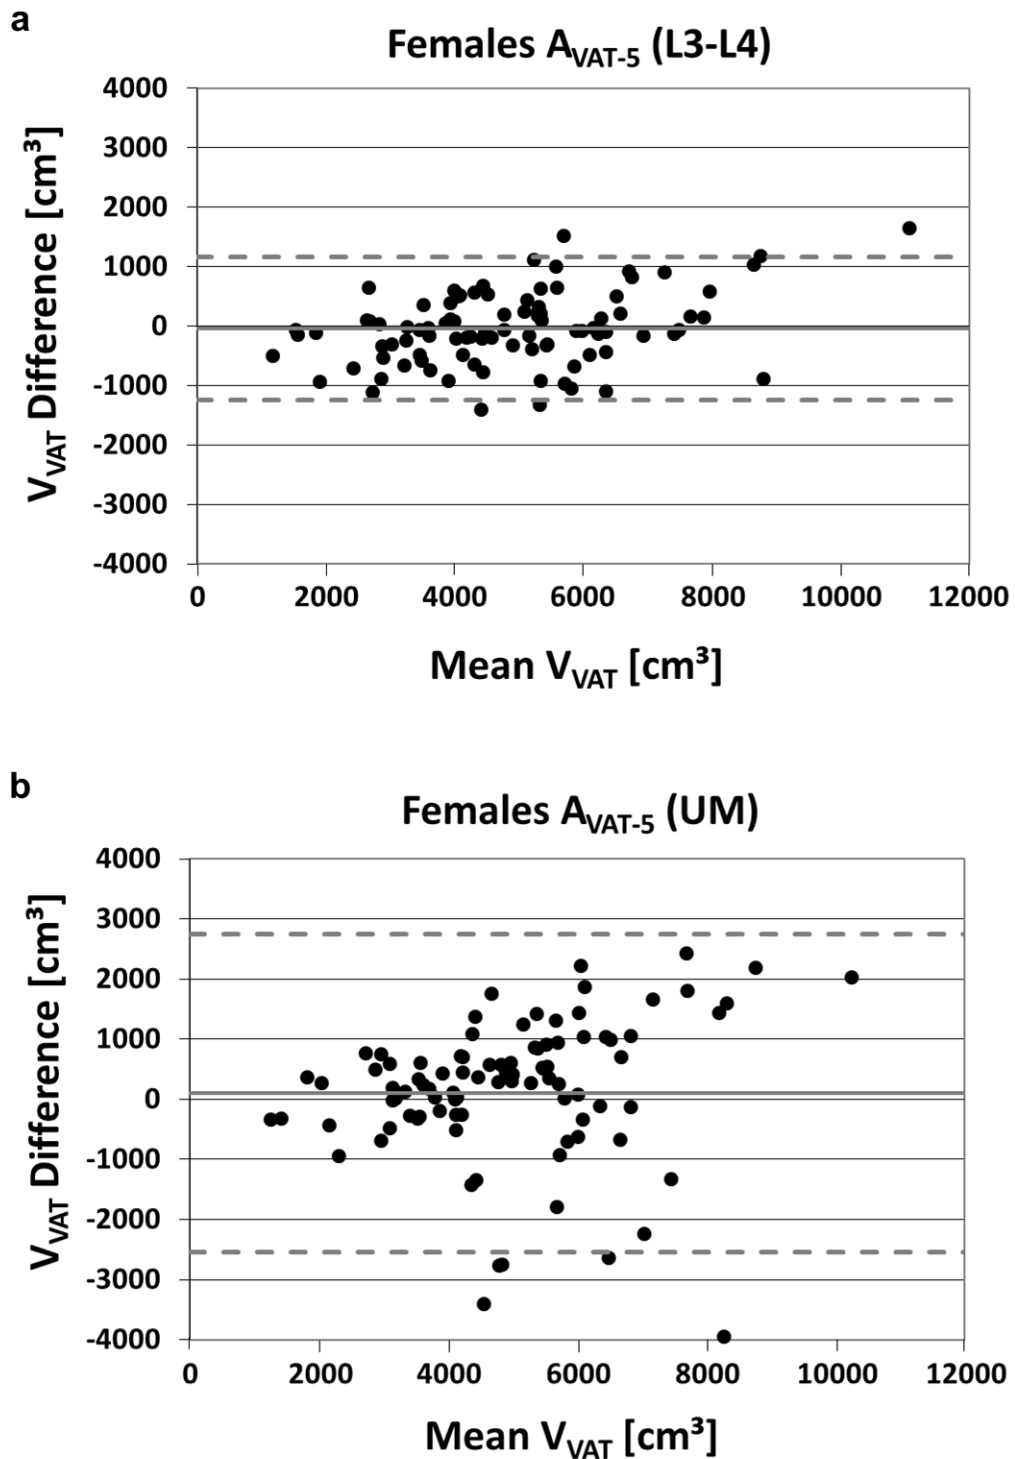

**Figure S4: Sample Bland-Altman plots in females (n=94) showing levels of agreement between estimated ( $V_{VAT-5}$ ) and measured total VAT volumes ( $V_{VAT-T}$ ) at the optimum L3-L4 (**a**) and the umbilical level (**b**). Solid and dashed gray lines indicate bias and limits of agreement, respectively (here: bias  $\pm 1.96 \cdot \sigma_5$ ).**

## Females

| Age                 | All ages     | < 39.2 years | 39.6 – 50.8 years | > 50.9 years |            |       |            |       |
|---------------------|--------------|--------------|-------------------|--------------|------------|-------|------------|-------|
| Number of patients  | <i>n</i> =94 | <i>n</i> =31 | <i>n</i> =32      | <i>n</i> =31 |            |       |            |       |
|                     | $\sigma$     | $f$          | $\sigma$          | $f$          |            |       |            |       |
| $A_{VAT-1}$ (L2-L3) | 836          | 0.042        | 802               | 0.040        | 907        | 0.043 | 791        | 0.042 |
| $A_{VAT-1}$ (L3-L4) | <b>685</b>   | 0.045        | <b>613</b>        | 0.044        | <b>768</b> | 0.045 | <b>654</b> | 0.047 |
| $A_{VAT-5}$ (L2-L3) | 691          | 0.210        | 629               | 0.199        | 747        | 0.218 | 655        | 0.208 |
| $A_{VAT-5}$ (L3-L4) | <b>611</b>   | 0.222        | <b>573</b>        | 0.214        | <b>638</b> | 0.221 | <b>603</b> | 0.229 |

## Males

| Age                 | All ages     | < 40.4 y.o.  | 41.3 – 51.3 y.o. | > 51.3 y.o.  |            |       |             |       |
|---------------------|--------------|--------------|------------------|--------------|------------|-------|-------------|-------|
| Number of patients  | <i>n</i> =36 | <i>n</i> =12 | <i>n</i> =12     | <i>n</i> =12 |            |       |             |       |
|                     | $\sigma$     | $f$          | $\sigma$         | $f$          |            |       |             |       |
| $A_{VAT-1}$ (L1-L2) | <b>989</b>   | 0.039        | 854              | 0.038        | 845        | 0.041 | <b>1091</b> | 0.038 |
| $A_{VAT-1}$ (L2-L3) | 1023         | 0.041        | <b>835</b>       | 0.039        | <b>825</b> | 0.043 | 1240        | 0.040 |
| $A_{VAT-5}$ (L1-L2) | <b>850</b>   | 0.194        | <b>762</b>       | 0.189        | <b>651</b> | 0.203 | <b>975</b>  | 0.188 |
| $A_{VAT-5}$ (L2-L3) | 1063         | 0.203        | 802              | 0.193        | 922        | 0.213 | 1313        | 0.198 |

**Table S5: Age-dependent analysis** for best and second-best anatomical references in both genders for the prediction of  $V_{VAT-T}$  from segmented VAT areas  $A_{VAT-1}$  and  $A_{VAT-5}$  as well as corresponding scaling factors *f*. Bold values correspond to best agreement (smallest standard deviation  $\sigma$ ) of all landmarks within each age group. L1-L2 to L3-L4: lumbar intervertebral spaces.
